# Supplementary material for: Measurement report: Impact of emission control measures on environmental persistent free radicals and reactive oxygen species – a short-term case study in Beijing
Source: Copernicus journal article supplement (doi:10.5194/acp-24-8737-2024), 2024-08-08
Supplement: Supplementary file 1 [file acp-24-8737-2024-supplement.pdf]

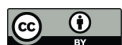

*Supplement of*

**Measurement report: Impact of emission control measures on environmental persistent free radicals and reactive oxygen species – a short-term case study in Beijing**

Yuanyuan Qin et al.

*Correspondence to:* Yang Zhang (zhangyang@ucas.ac.cn) and Jihua Tan (tanjh@ucas.ac.cn)

The copyright of individual parts of the supplement might differ from the article licence.

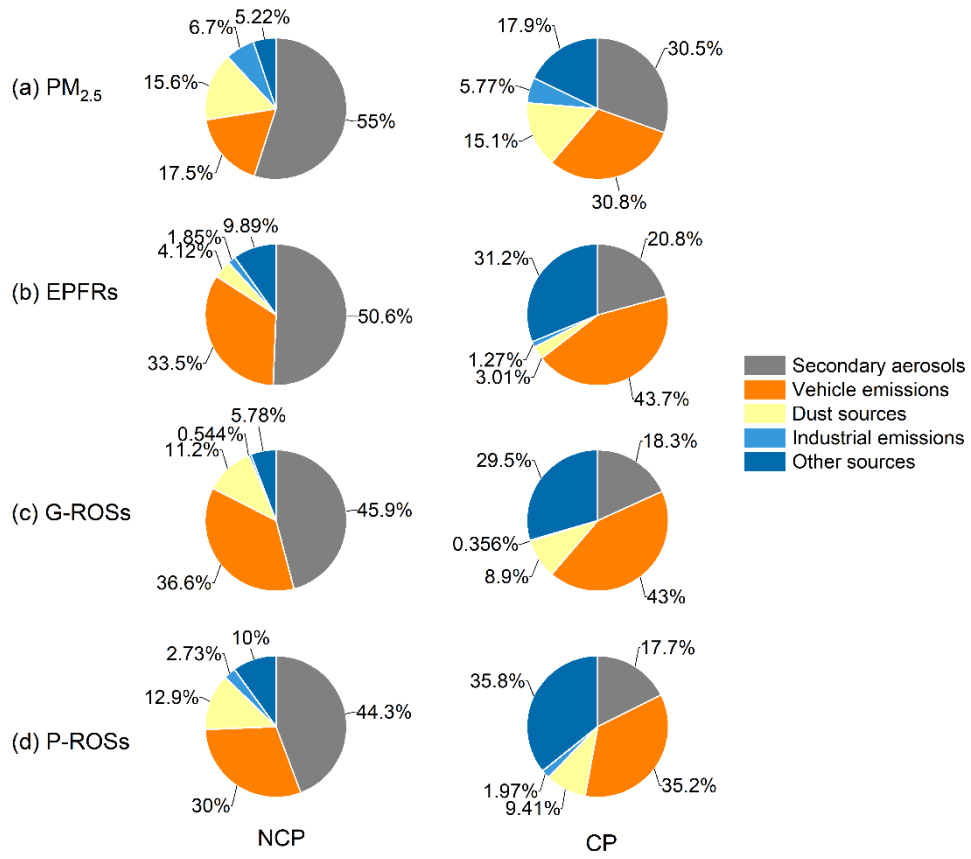

Figure S1: The contributions of different sources to (a) PM<sub>2.5</sub>, (b) EPFRs, (c) G-ROSSs, and (d) P-ROSSs during NCP and CP.

30

35

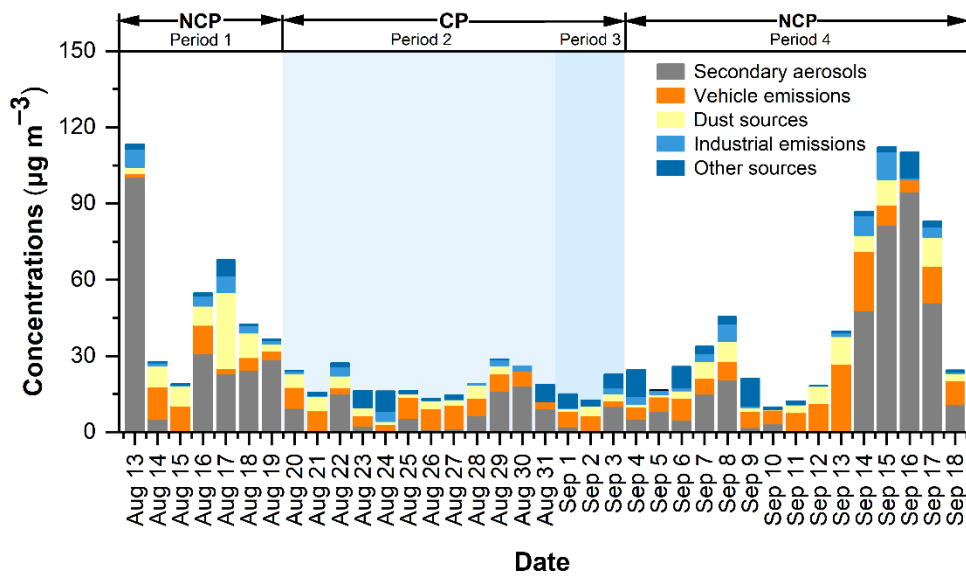

Figure S2: Time series of the source contributions to PM<sub>2.5</sub>.

40

45

50

55

**Table S1: Sampling schedule.**

| Sampling time  | Period   | Number of samples (n) |
|----------------|----------|-----------------------|
| 2015.8.13–8.19 | Period 1 | 14                    |
| 2015.8.20–8.31 | Period 2 | 24                    |
| 2015.9.1–9.3   | Period 3 | 6                     |
| 2015.9.4–9.19  | Period 4 | 32                    |

60

65

70

75

80

85

**Table S2: Descriptions of control measures implemented in different periods. “√” denotes the control.**

| Control measures            |                                              | Period 1 | Period 2 | Period 3 | Period 4 |
|-----------------------------|----------------------------------------------|----------|----------|----------|----------|
| Long-term routine measures  |                                              | √        | √        | √        | √        |
|                             | Odd-and-even plate rule for vehicle use      |          | √        | √        |          |
|                             | Polluting industry restriction               |          | √        | √        |          |
|                             | Construction sites shutdown                  |          | √        | √        |          |
| Short-term routing measures | Delay of school opening                      |          | √        | √        |          |
|                             | Vacation days off                            |          |          | √        |          |
|                             | More frequent road sprinkling                |          | √        | √        |          |
|                             | Road traffic control around Tiananmen Square |          |          | √        |          |
|                             | Museum and tourist attraction closeds        |          |          | √        |          |
|                             | Enhanced measures in surrounding cities      |          |          | √        |          |
